# Supplementary material
Source: Springer Nature journal article supplement (https://www.springermedizin.de/resource/supplementary/12943_2011_939_MOESM5_ESM.pdf/9551734)

A

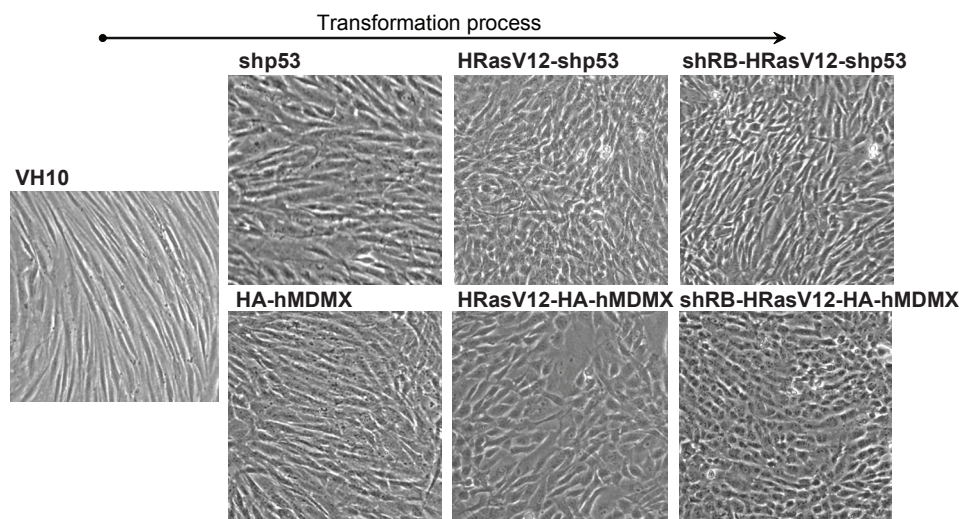

B

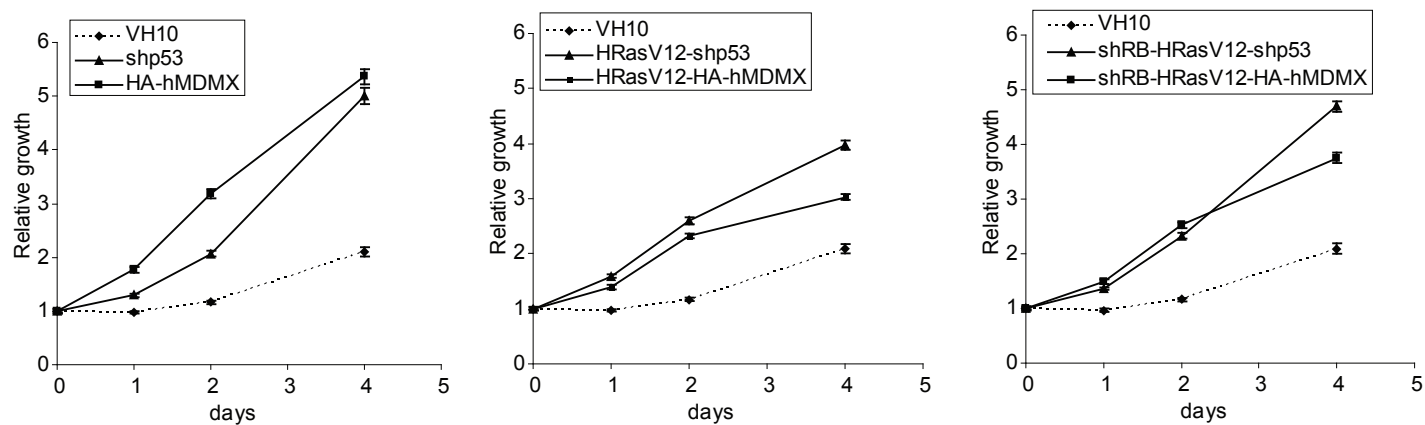

C

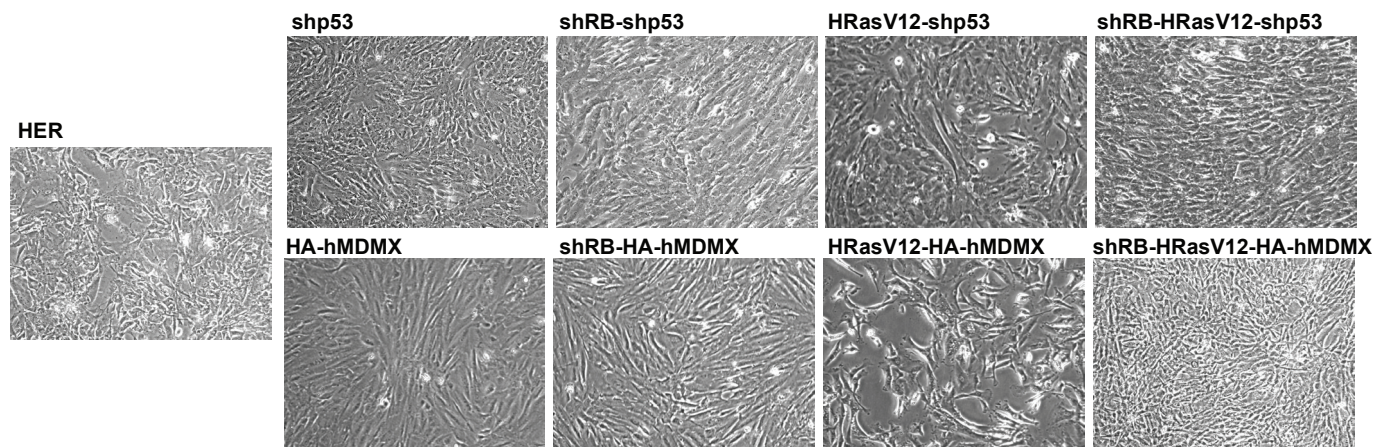

D

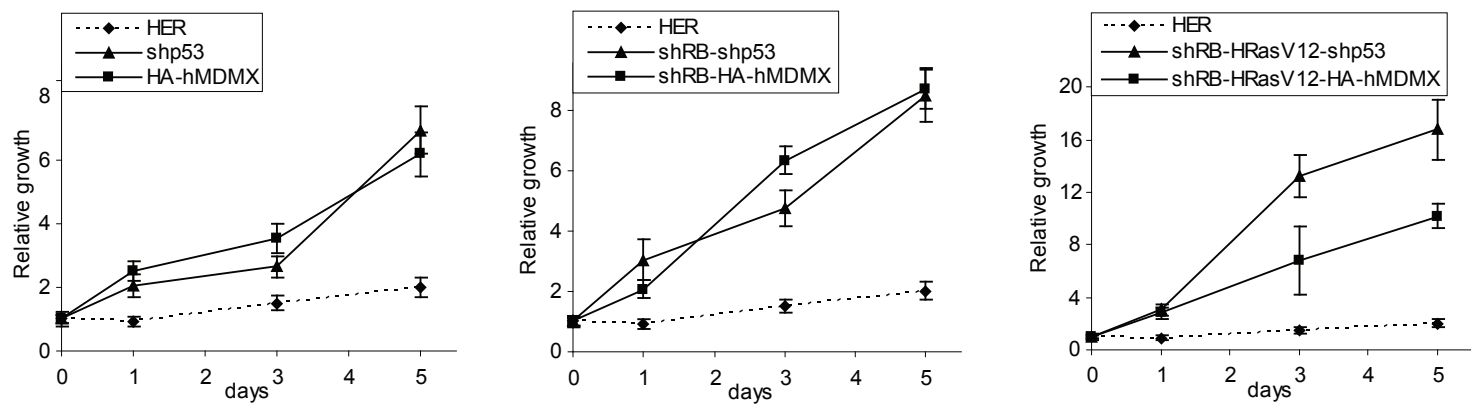

Supplement: MOESM5 [file 9551734]
